# Supplementary material for: Promotion of mixed protonic–electronic transport in La5.4WO11.1−δ membranes under H2S atmospheres
Source: Royal Society of Chemistry journal article supplement (doi:10.1039/d3ta01827j), 2023-01-01
Supplement: d3ta01827j1.pdf [file d3ta01827j1.pdf]

### Supporting information

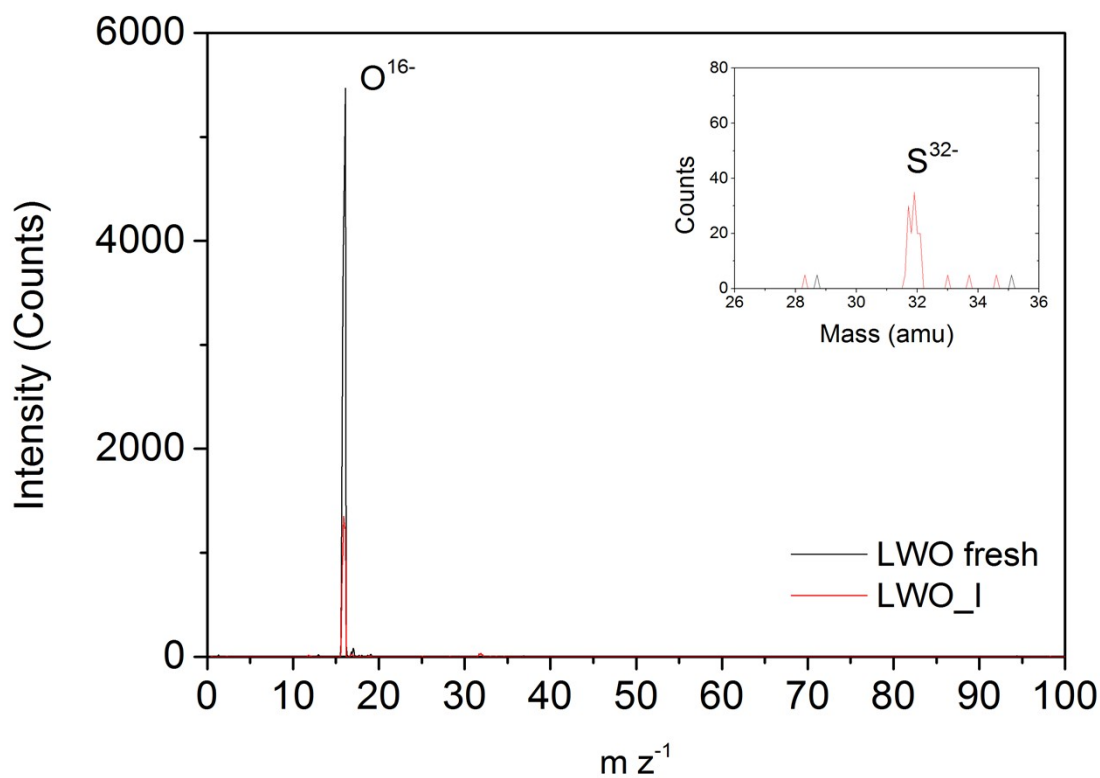

Figure S1: Negative FIB-SIMS spectrum in the range between  $m/z=0$  and 100, where  $^{16}\text{O}^-$ ,  $^{17}\text{OH}^-$  and  $^{32}\text{S}^-$  (only for LWO\_I) can be observed. The inset shows the FIB-SIMS spectrum in the range 26 to 36 to check the signal at  $m/z=32$  for a fresh sample and a sample treated with sulfur (LWO\_I). The fresh sample has no signal for  $^{32}\text{O}^-$  and therefore, the signal at  $m/z=32$  for the sample treated with sulfur can be assumed that is due to  $^{32}\text{S}^-$ .

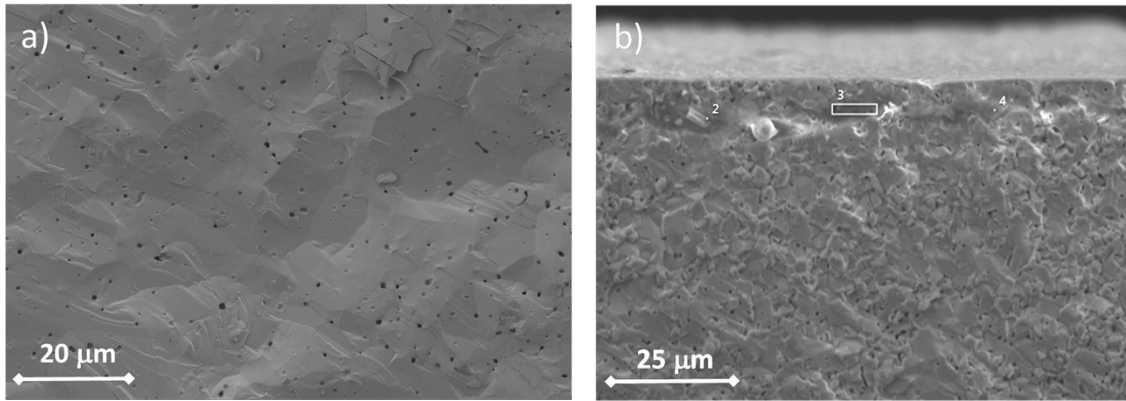

Figure S2: SEM cross-sectional images of the membranes before (a) and after (b) the H<sub>2</sub> permeation measurements.

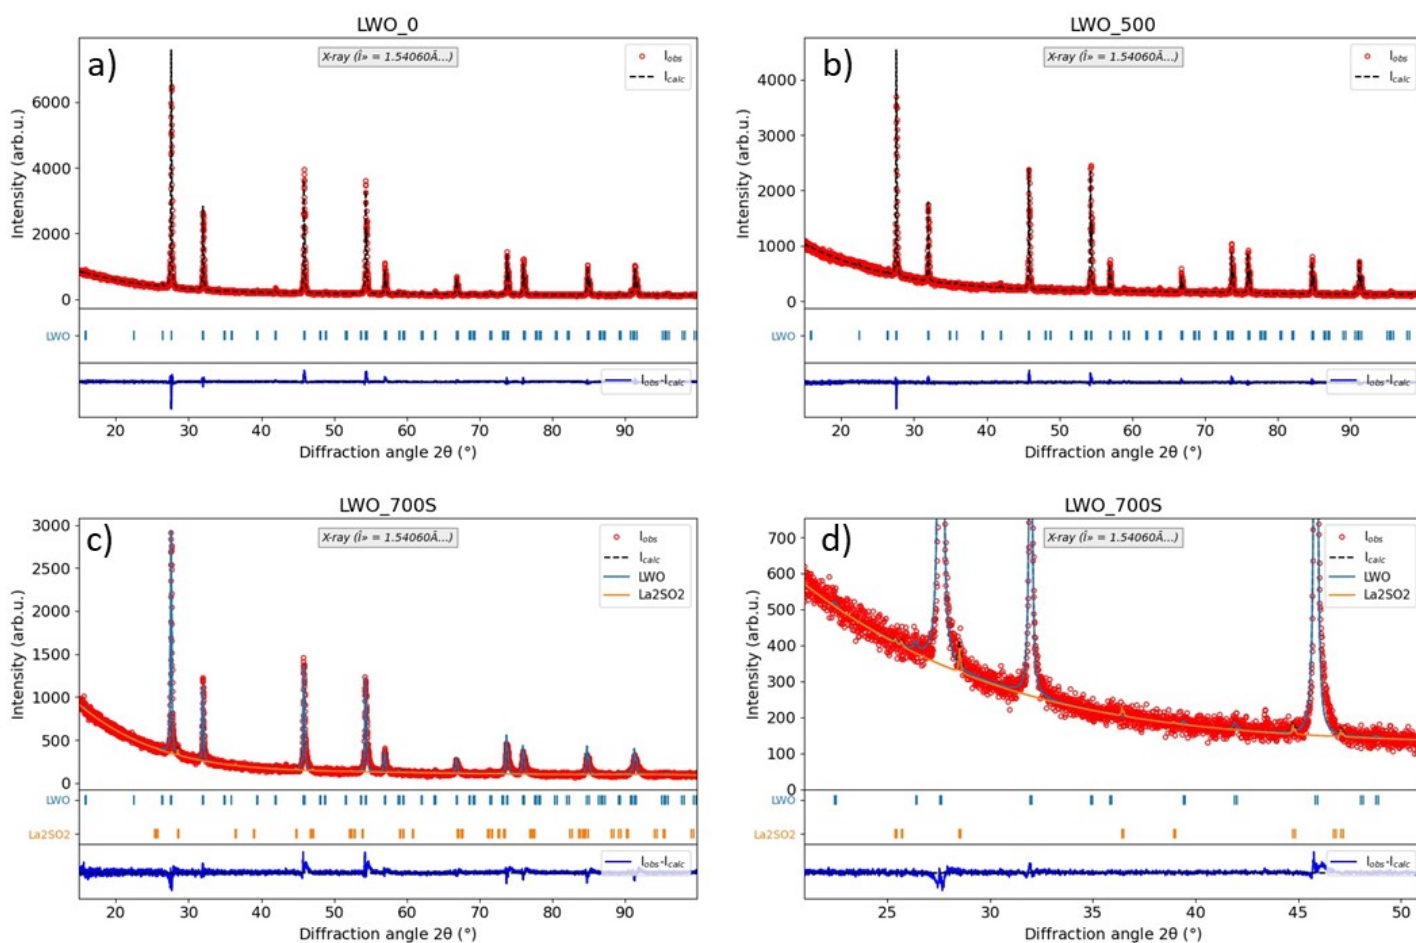

Figure S3: Rietveld refinements of sample LWO as prepared, LWO\_0 (a) and treated at 500 °C, LWO\_500 (b) and 700 °C, LWO\_700S, (c and zoom in d) for 24 h with a stream consisting of ~2000 ppm H<sub>2</sub>S and 10% H<sub>2</sub> saturated by water at room temperature (pH<sub>2</sub>O= 0.025 atm). Structural models employed: LWO (La<sub>6.82</sub>O<sub>13.52</sub>W<sub>1.17</sub>), ICSD-189792 (Space group: F m - 3 m) and La<sub>2</sub>O<sub>2</sub>S: ICSD-260145 (Space Group: P 3 m 1).

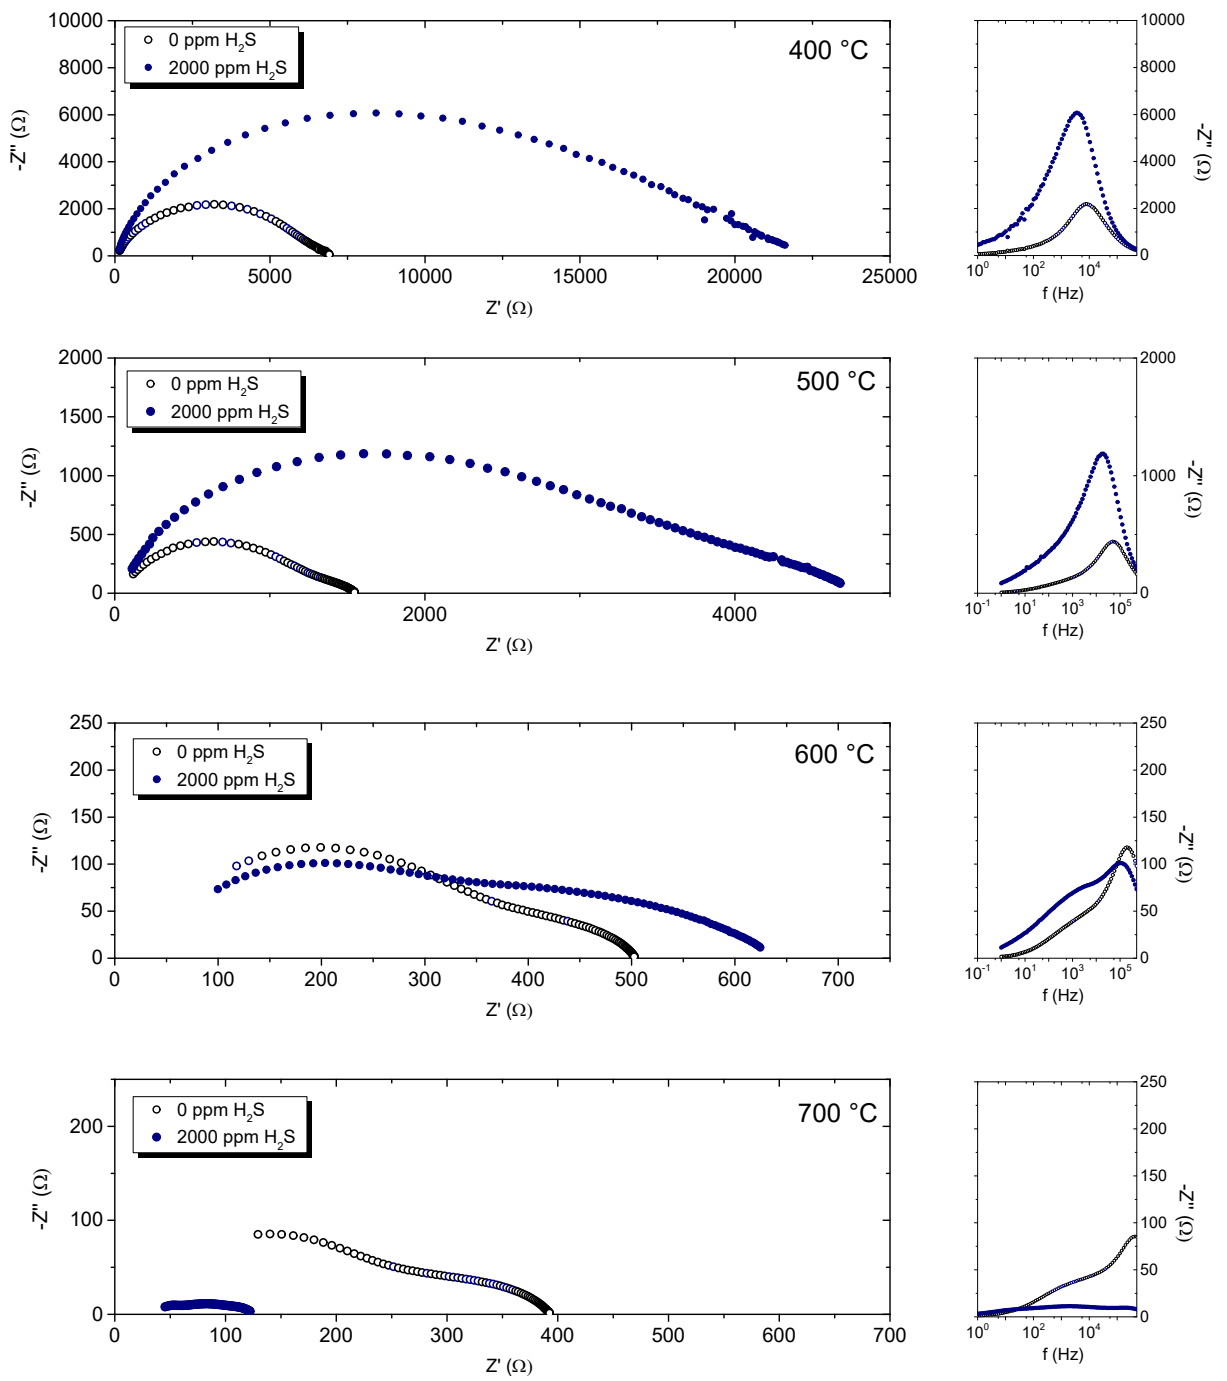

Figure S4: Impedance spectroscopy measurements under wet 10% H<sub>2</sub> in N<sub>2</sub> with 0 ppm H<sub>2</sub>S (open symbols) and 2000 ppm H<sub>2</sub>S after 24 hours of exposure (filled symbols).

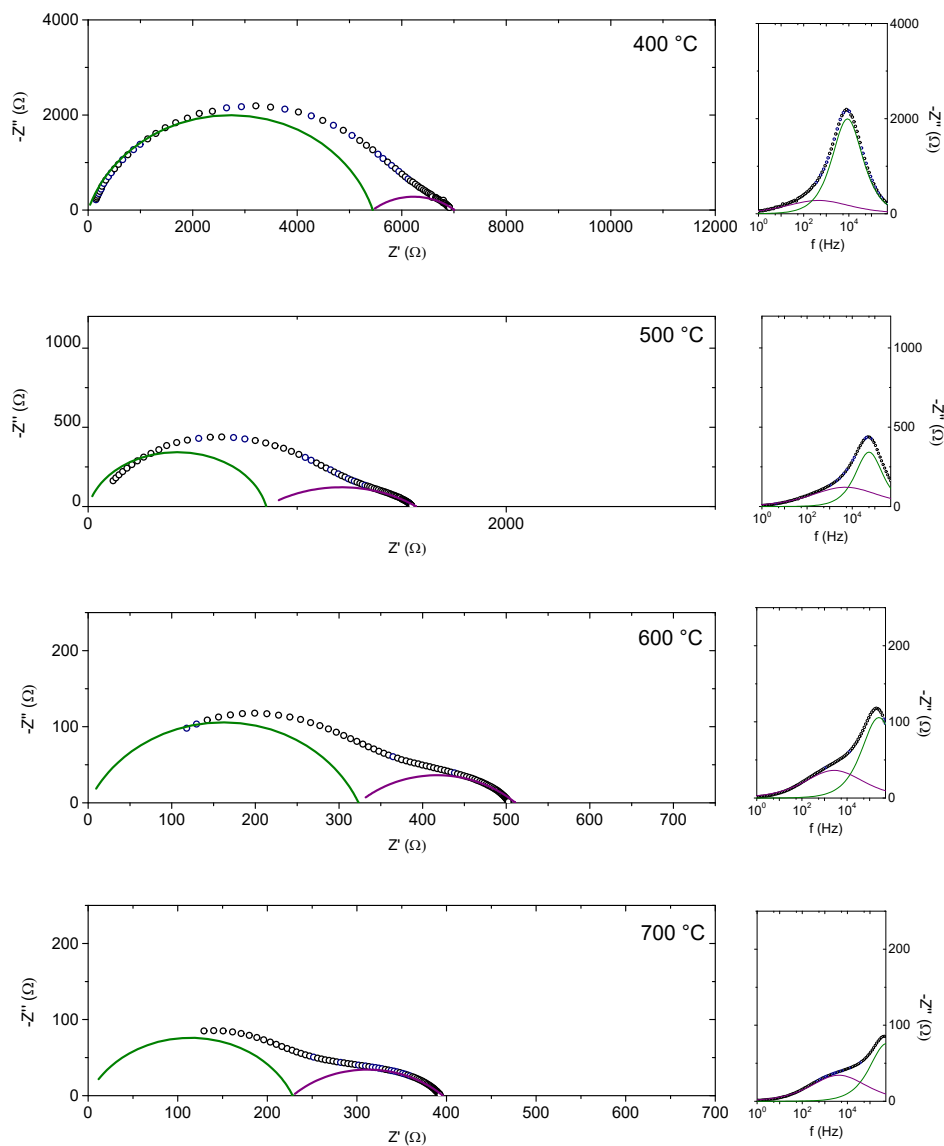

Figure S5: Impedance spectroscopy measurements under wet 10% H<sub>2</sub> in N<sub>2</sub> with 0 ppm H<sub>2</sub>S (open symbols). Solid lines correspond to the fit using the equivalent circuits explained in the main text.

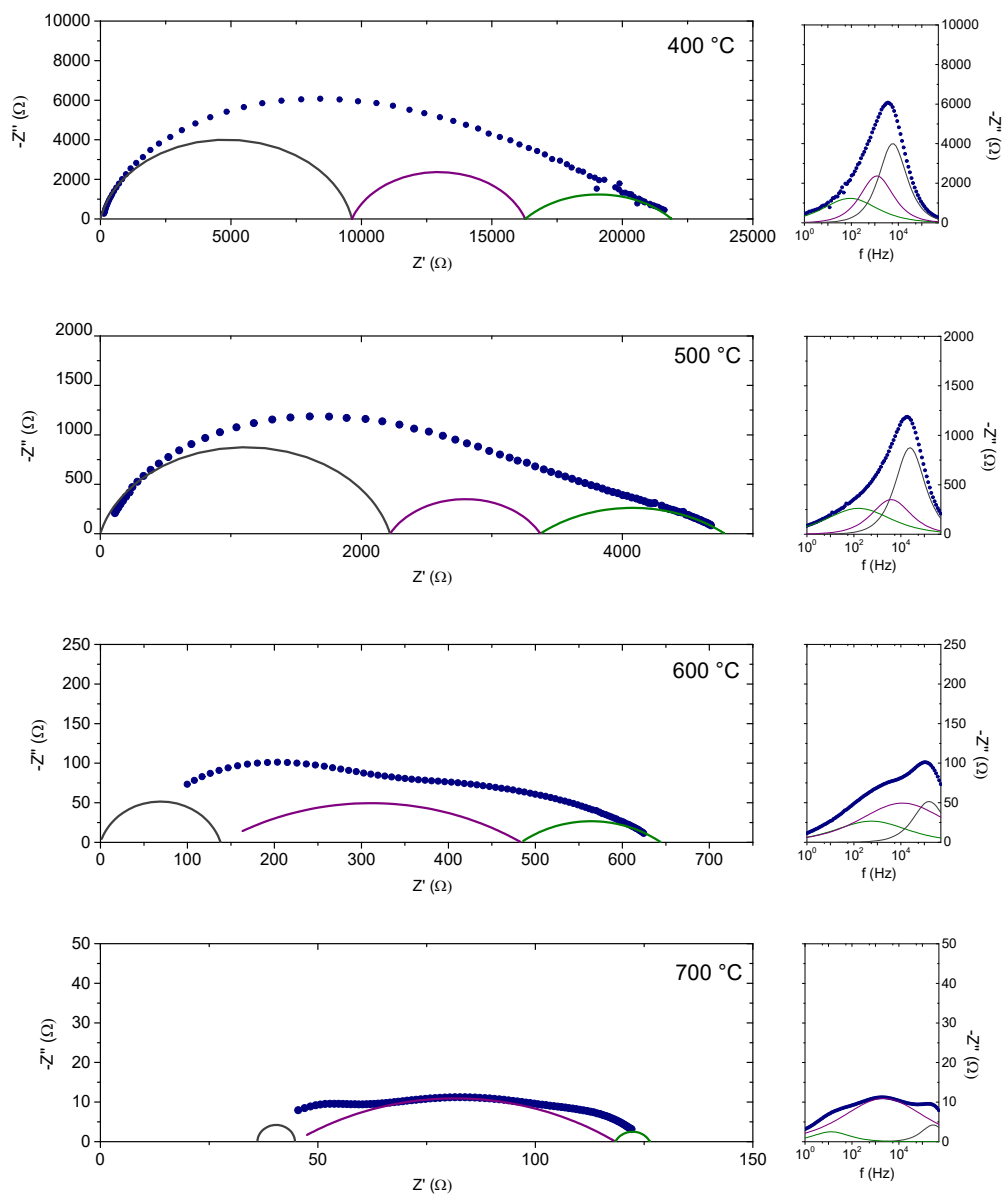

Figure S6: Impedance spectroscopy measurements under wet 10% $H_2$  in  $N_2$  with 2000 ppm  $H_2S$  after 24 hours of exposure (filled symbols). Solid lines correspond to the fit using the equivalent circuits explained in the main text.

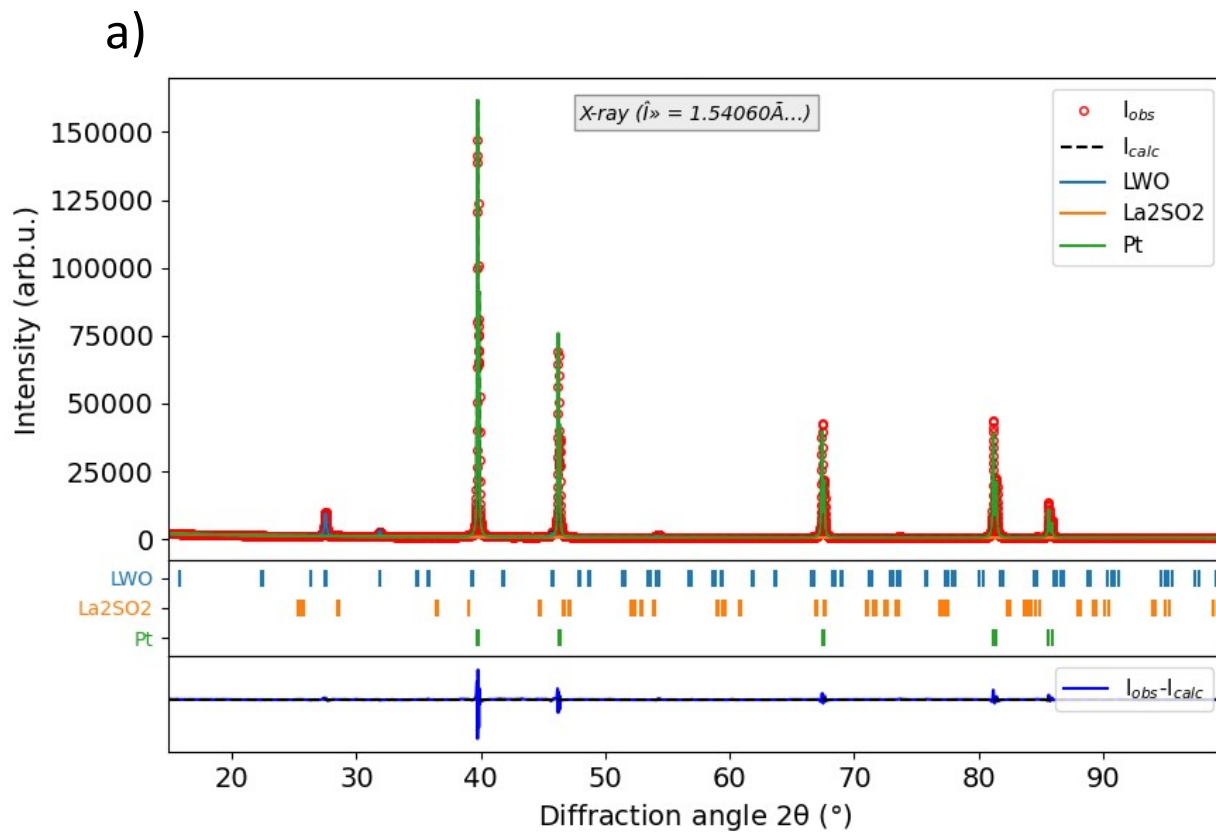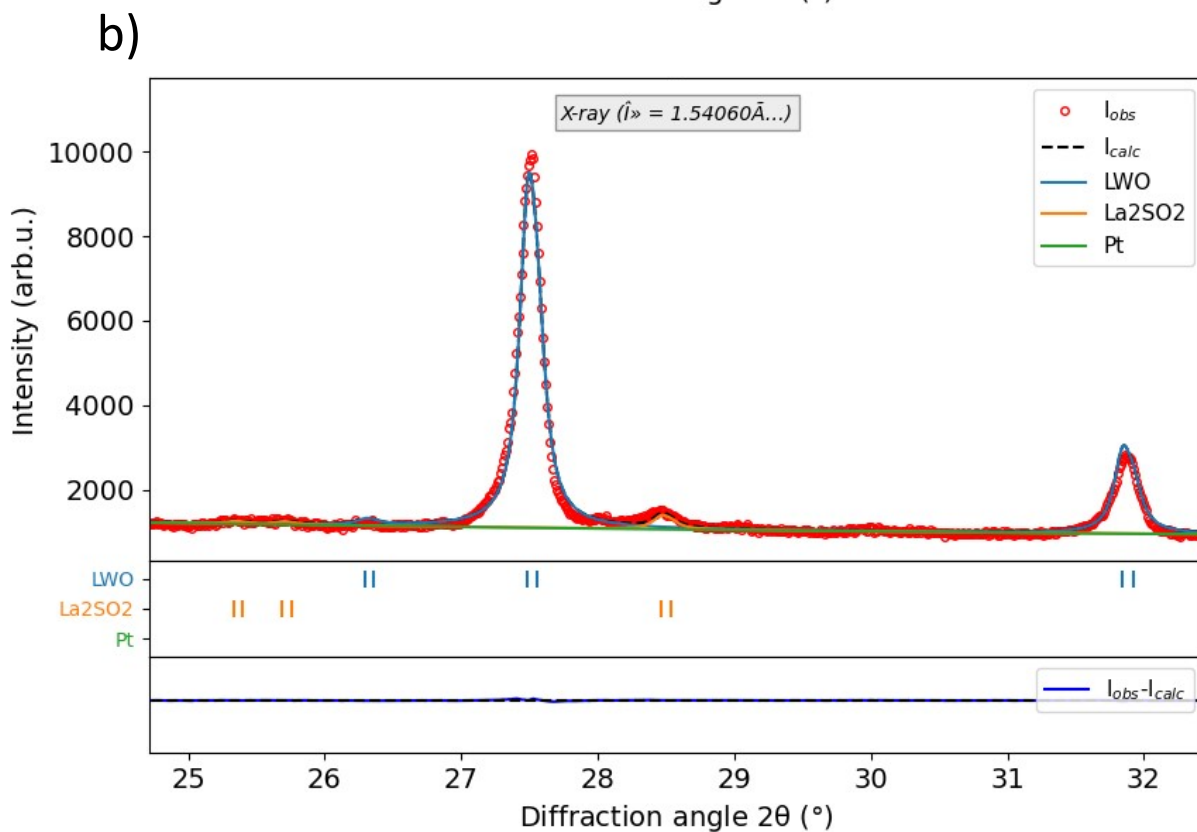

Figure S7: Rietveld refinements of sample LWO\_I after the EIS measurements (a) and zoom in (b). Structural models employed: LWO (La<sub>6.82</sub>O<sub>13.52</sub>W<sub>1.17</sub>), ICSD-189792 (Space group: Fm-3m) and La<sub>2</sub>O<sub>2</sub>S: ICSD-260145 (Space Group: P3m1).
